# Supplementary material for: Echinacea purpurea Fractions Represent Promising Plant-Based Anti-Inflammatory Formulations
Source: MDPI journal article supplement (doi:10.3390/antiox12020425), 2023-02-09
Supplement: s1 [file s1]

---

*Supplementary Material*

**Table S1.** Parameters of the optimized gradient method for analytical separation.

| <b>Time (min)</b> | <b>Water with 0.1% formic acid (%)</b> | <b>ACN (%)</b> |
|-------------------|----------------------------------------|----------------|
| 0                 | 90                                     | 10             |
| 18                | 85                                     | 15             |
| 30                | 10                                     | 90             |
| 35                | 10                                     | 90             |
| 36                | 90                                     | 10             |
| 45                | 90                                     | 10             |

---

**Table S2.** Properties of caftaric acid, chlorogenic acid, caffeic acid, cynarin, echinacoside, chicoric acid, undeca-2E/Z-ene-8,10-diynoic acid isobutylamide, dodeca-2E-ene-8,10-diynoic acid isobutylamide, dodeca-2E,4E-dienoic acid isobutylamide, and dodeca-2E,4E,8Z,10E/Z-tetraenoic acid isobutylamide determined by LC-HRMS.

| Standard compound | Chemical structure                                                                  | Formula                                         | Exact mass   | Theoretical precursor ion ( $m/z$ ) | Precursor ion ( $m/z$ )        | $t_R$ (min) | Product ions ( $m/z$ )                                                                                                                                      |
|-------------------|-------------------------------------------------------------------------------------|-------------------------------------------------|--------------|-------------------------------------|--------------------------------|-------------|-------------------------------------------------------------------------------------------------------------------------------------------------------------|
| Caftaric acid     | 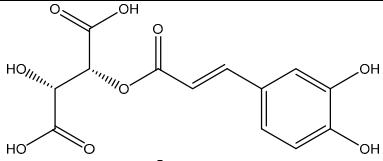   | C <sub>13</sub> H <sub>12</sub> O <sub>9</sub>  | 312.04813196 | 311.0403                            | 311.0405<br>[M-H] <sup>-</sup> | 3.1         | 135.0451 (100), 179.0350 (27),<br>149.0090 (17)                                                                                                             |
| Chlorogenic acid  |    | C <sub>16</sub> H <sub>18</sub> O <sub>9</sub>  | 354.09508215 | 353.0873                            | 353.0874<br>[M-H] <sup>-</sup> | 4.1         | 191.0560 (100), 192.0592 (6),<br>161.0245 (2), 127.0401 (2), 85.0291<br>(2), 179.0346 (1)                                                                   |
| Caffeic acid      |   | C <sub>9</sub> H <sub>8</sub> O <sub>4</sub>    | 180.04225873 | 179.0345                            | 179.0350<br>[M-H] <sup>-</sup> | 5.1         | 135.0449 (100), 134.0372 (90),<br>89.0395 (9), 117.0343 (7), 107.0500<br>(7), 136.0484 (7)                                                                  |
| Cynarin           |  | C <sub>25</sub> H <sub>24</sub> O <sub>12</sub> | 516.12677620 | 515.1190                            | 515.1195<br>[M-H] <sup>-</sup> | 6.2         | 191.0563 (100), 179.0351 (89),<br>353.0877 (22), 135.0453 (15),<br>180.0384 (8), 161.0245 (8), 192.0598<br>(7), 173.0459 (6), 354.0910 (4),<br>335.0768 (4) |
| Echinacoside      |  | C <sub>35</sub> H <sub>46</sub> O <sub>20</sub> | 786.25824385 | 785.2504                            | 785.2505<br>[M-H] <sup>-</sup> | 7.3         | 785.2507 (100), 161.0246 (81),<br>623.2193 (64), 786.2539 (41),<br>624.2229 (18), 787.2581 (11),<br>162.0280 (8), 179.0357 (6)                              |

|                                                                  |                                                                                    |                                                 |              |          |                                |      |                                                                                                                                                           |
|------------------------------------------------------------------|------------------------------------------------------------------------------------|-------------------------------------------------|--------------|----------|--------------------------------|------|-----------------------------------------------------------------------------------------------------------------------------------------------------------|
| Chicoric acid                                                    | 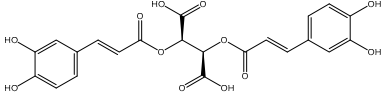  | C <sub>22</sub> H <sub>18</sub> O <sub>12</sub> | 474.07982601 | 473.0720 | 473.0725<br>[M-H] <sup>-</sup> | 9.0  | 179.0351 (100), 149.0094 (71),<br>135.0452 (17), 219.0299 (12),<br>180.0386 (7), 161.0243 (4), 293.0301<br>(4), 112.9881 (4), 311.0393 (1)                |
| Undeca-2E/Z-ene-<br>8,10-diynoic acid<br>isobutylamide           |   | C <sub>15</sub> H <sub>21</sub> NO              | 231.16231    | 232.1701 | 232.1698<br>[M-H] <sup>+</sup> | 20.5 | 91.0544 (100), 115.0544 (43),<br>105.0701 (43), 116.0618 (35),<br>103.0544 (20), 129.0699 (12)                                                            |
| Dodeca-2E-ene-<br>8,10-diynoic acid<br>isobutylamide             |   | C <sub>16</sub> H <sub>23</sub> NO              | 245.17796    | 246.1858 | 246.1855<br>[M-H] <sup>+</sup> | 20.8 | 91.0544 (100), 105.0700 (83),<br>117.0699 (45), 115.0544 (36),<br>103.0544 (28), 129.0697 (24),<br>130.0774 (24), 77.0378 (20)                            |
| Dodeca-<br>2E,4E,8Z,10E/Z-<br>tetraenoic acid iso-<br>butylamide |   | C <sub>16</sub> H <sub>25</sub> NO              | 247.19361    | 248.2014 | 248.2010<br>[M-H] <sup>+</sup> | 21.3 | 152.1071 (100), 95.0492 (59), 96.0447<br>(57), 110.0601 (18), 124.0758 (14),<br>167.1303 (13), 91.0543 (10), 112.0758<br>(10), 153.1103 (10), 81.0691 (9) |
| Dodeca-2E,4E-<br>dienoic acid isobu-<br>tylamide                 |  | C <sub>16</sub> H <sub>29</sub> NO              | 251.22491    | 252.2327 | 252.2326<br>[M-H] <sup>+</sup> | 22.0 | 95.0856 (100), 98.0602 (93), 95.0493<br>(52), 81.0691 (43), 196.1696 (32),<br>112.0759 (28), 109.1013 (26),<br>126.0914(25)                               |

**Table S3.** Phenolic/carboxylic acids compounds tentatively identified in *E. purpurea* fractions by LC-HRMS (negative mode).

| Proposed phenolic compound                                            | Precursor ion<br>[M – H] <sup>-</sup> (m/z) | t <sub>R</sub><br>(min) | Product ions (m/z) <sup>1</sup>                                                       |
|-----------------------------------------------------------------------|---------------------------------------------|-------------------------|---------------------------------------------------------------------------------------|
| <b>Ethanolic Extracts obtained from Flowers – Faction 1 (EE-F-F1)</b> |                                             |                         |                                                                                       |
| Protocatechuic acid                                                   | 153.0195                                    | 2.8                     | 108.0218 (100), 109.0287 (91), 91.0185 (17)                                           |
| Chlorogenic acid <sup>a</sup>                                         | 353.0876                                    | 4.0                     | 191.0562 (100), 192.0606 (5), 127.0404 (3), 85.0292 (2), 161.0250 (2), 179.0929 (0.3) |

|                            |          |     |                                                                                                                                   |
|----------------------------|----------|-----|-----------------------------------------------------------------------------------------------------------------------------------|
| Caffeic acid <sup>a</sup>  | 179.0347 | 5.1 | 134.0373 (100), 135.0450 (92), 89.0395 (13), 136.0489 (9), 107.0498 (9), 117.0347 (7)                                             |
| Chicoric acid <sup>a</sup> | 473.0722 | 8.9 | 179.0349 (100), 149.0093 (70), 135.0452 (15), 219.0299 (13), 180.0384 (9), 161.0244 (4), 293.0299 (4), 112.9882 (3), 311.0420 (1) |
| Rutin                      | 609.1459 | 9.2 | 300.0272 (100), 609.1457 (60), 301.0336 (44), 610.1491 (19), 302.0368 (7), 611.1523 (3)                                           |
| Rutin derivative           | 609.1459 | 9.4 | 300.0273 (100), 609.1456 (63), 301.0341 (63), 610.1494 (19), 302.0372 (8), 611.1511 (4)                                           |

F: flowers; EE: ethanolic extracts; F1: phenol/-carboxylic acid fraction..

<sup>a</sup> Injected standards

<sup>1</sup> The MS<sup>2</sup> data were obtained from the fragmentation of the [M – H]<sup>–</sup> precursor ion of phenolic compounds. Relative intensities of product ions are in parentheses.

**Table S4.** Alkylamides compounds tentatively identified in *E. purpurea* fractions by LC-HRMS (positive mode).

| Proposed alkylamide compound                                           | Precursor ion [M + H] <sup>+</sup> (m/z) | t <sub>R</sub> (min) | Product ions (m/z) <sup>1</sup>                                                                                                                                                                         |
|------------------------------------------------------------------------|------------------------------------------|----------------------|---------------------------------------------------------------------------------------------------------------------------------------------------------------------------------------------------------|
| Dichloromethanolic Extracts obtained from Roots – Fraction 2 (DE-R-F2) |                                          |                      |                                                                                                                                                                                                         |
| Dodeca-2E,4Z,10E-triene-8-ynoic acid isobutylamide                     | 246.1852                                 | 14.9                 | 145.1015 (46), 119.0860 (38), 128.0633 (11), 173.0948 (8), 93.0708 (6)                                                                                                                                  |
| Dodeca-2E,4Z,10Z-triene-8-ynoic acid isobutylamide                     | 246.1854                                 | 15.5                 | 119.085 (53), 145.1008 (46), 93.0691 (11), 173.0947 (11), 128.0628 (9), 102.0925 (6)                                                                                                                    |
| Dodeca-2E,4E,10Z-triene-8-ynoic acid isobutylamide                     | 246.1852                                 | 19.0                 | 145.1018 (39), 128.0619 (38), 119.0480 (31), 93.0699 (22), 154.1227 (6)                                                                                                                                 |
| Dodeca-2Z,4E,10Z-triene-8-ynoic acid isobutylamide                     | 246.1853                                 | 19.4                 | 145.1015 (35), 119.0854 (23), 128.0620 (21), 173.0963 (7), 93.0702 (5), 154.0761 (2)                                                                                                                    |
| Dodeca-2E,4E,10E-triene-8-ynoic acid isobutylamide                     | 246.1852                                 | 20.2                 | 128.0618 (85), 119.0860 (21), 93.0703 (17), 145.1009 (14), 154.0631 (6), 102.0906 (4)                                                                                                                   |
| Undeca-2E,4Z-diene-8,10-diynoic acid isobutylamide                     | 230.1549                                 | 20.3                 | 128.0621 (100), 91.0543 (47), 116.0617 (28), 129.0684 (21), 103.0543 (9), 117.0645 (3), 102.0464 (2), 157.0650 (1), 174.0914 (1), 142.0417 (0.1), 202.1588 (0), 188.14390 (0), 74.0146 (0), 57.0683 (0) |
| Undeca-2Z,4E-diene-8,10-diynoic acid isobutylamide                     | 230.1546                                 | 20.6                 | 128.062 (100), 91.0543 (41), 129.0686 (26), 116.0617 (26), 103.0542 (9), 117.0595 (4), 102.0465 (2), 157.0648 (2), 174.0912 (1), 188.1432 (0.4), 142.0651 (0.2), 202.1586 (0.1)                         |
| Dodeca-2E,4Z-diene-8,10-diynoic acid isobutylamide                     | 244.1712                                 | 20.7                 | 129.0687 (27), 91.0543 (22), 116.0606 (8), 188.1070 (2), 156.0624 (1), 157.0648 (0.4), 174.0898 (0.2), 216.1747 (0.1), 88.1111 (0), 57.0687 (0)                                                         |
| Dodeca-2E-ene-8,10-diynoic acid isobutylamide <sup>a</sup>             | 246.1851                                 | 20.9                 | 128.0621 (100), 115.0543 (42), 105.0700 (29), 91.0543 (28), 117.0699 (26), 129.0685 (25), 103.0543 (13), 130.0768 (13)                                                                                  |

|                                                                                     |          |      |                                                                                                                                                                                                             |
|-------------------------------------------------------------------------------------|----------|------|-------------------------------------------------------------------------------------------------------------------------------------------------------------------------------------------------------------|
| Trideca-2E,7Z-diene-10,12-diynoic acid isobutylamide                                | 258.1864 | 21.0 | 128.0622 (100), 117.0699 (24), 103.0543 (8), 142.0769 (4), 131.0782 (1), 156.0618 (1), 102.0465 (1), 157.0646 (0.4), 230.1897 (0.1), 202.1223 (0.1), 216.1745 (0.1), 185.0840 (0.1), 74.0141 (0)            |
| Dodeca-2,4-diene-8,10-diynoic acid 2-methylbutylamide                               | 258.1864 | 21.0 | 117.0699 (24), 91.0543 (22), 105.0700 (21), 143.0855 (14), 116.0604 (7), 142.0769 (4), 171.0804 (3), 188.1070 (3), 230.1538 (0.1), 168.1313 (0.1), 202.1223 (0.1), 88.1113 (0.1), 156.1365 (0), 71.0844 (0) |
| Dodeca-2Z,4Z,10Z-triene-8-ynoic acid isobutylamide <sup>2</sup>                     | 246.1853 | 21.2 | 93.0699 (4), 119.0856 (3), 128.0621 (3), 102.0914 (2), 145.0649 (1), 154.1181 (0.4), 173.0943 (0.1), 57.0685 (0.1), 190.1608 (0), 74.0136 (0)                                                               |
| Trideca-2E,7Z-diene-10,12-diynoic acid 2-methylbutylamide                           | 272.2009 | 21.2 | 116.0606 (25), 157.0999 (3), 202.1225 (1), 185.0879 (1)                                                                                                                                                     |
| Dodeca-2E,4E,8Z,10E/Z-tetraenoic acid isobutylamide <sup>a</sup>                    | 248.2017 | 21.4 | 152.1071 (100), 95.0492 (58), 96.0446 (57), 110.0601 (17), 124.0758 (15), 167.1302 (13), 91.0543 (11), 153.1103 (10), 112.0756 (10), 81.0691 (9)                                                            |
| Dodeca-2E,4Z,10E-triene-8-ynoic acid 2-methylbutylamide<br>OR                       | 260.2008 | 21.2 | 145.1012 (20), 119.0856 (17), 116.0611 (16), 173.0956 (3), 142.1228 (1), 190.1223 (1), 88.1112 (0.2), 71.7045 (0)                                                                                           |
| Dodeca-2E-ene-8,10-diynoic acid 2-methylbutylamide                                  |          |      |                                                                                                                                                                                                             |
| Pentadeca-2E,9Z-diene-12,14-diynoic acid isobutylamide                              | 286.2166 | 21.5 | 102.0915 (1), 185.1317 (1), 230.1549 (0.3), 213.1161 (0.2)                                                                                                                                                  |
| Dodeca-2E,4E,8Z-trienoic acid isobutylamide                                         | 250.2166 | 21.7 | 97.0491 (4), 102.0914 (3), 168.1345 (2), 83.0360 (2), 154.1212 (2), 194.1534 (1), 177.1271 (1), 149.1325 (0.4), 57.0679 (0.1)                                                                               |
| Dodeca-2E,4E,8Z,10E/Z-tetraenoic acid 2-methylbutylamide                            | 262.2167 | 21.6 | 116.1072 (3), 147.1170 (3), 88.1113 (1), 175.1114 (1), 192.1386 (0.3), 71.0845 (0.1)                                                                                                                        |
| Dodeca-2E,4E-dienoic acid isobutylamide <sup>a</sup>                                | 252.2323 | 22.0 | 95.0856 (100), 98.0601 (91), 95.0493 (52), 81.0691 (42), 196.1695 (32), 112.0758 (27), 109.1012 (27), 126.0915 (23)                                                                                         |
| <b>Dichloromethanolic Extracts obtained from Flowers – Fraction 2 i (DE-F-F2 i)</b> |          |      |                                                                                                                                                                                                             |
| Dodeca-2E,4Z,10E-triene-8-ynoic acid isobutylamide                                  | 246.1854 | 14.9 | 145.1013 (78), 119.0856 (27), 93.0699 (14), 128.0622 (10), 173.0975 (7)                                                                                                                                     |
| Dodeca-2E,4Z,10Z-triene-8-ynoic acid isobutylamide                                  | 246.1854 | 15.5 | 145.1015 (64), 119.0858 (46), 93.0704 (18), 128.0624 (8), 173.0974 (7), 190.1224 (4), 154.1233 (4)                                                                                                          |
| Dodeca-2E,4E,10E-triene-8-ynoic acid isobutylamide                                  | 246.1856 | 20.2 | 119.0858 (23), 93.0703 (14), 145.1015 (4), 128.0628 (3), 173.0963 (1)                                                                                                                                       |
| Undeca-2E,4Z-diene-8,10-diynoic acid isobutylamide                                  | 230.1553 | 20.2 | 128.0624 (100), 91.0545 (43), 116.0619 (27), 129.0684 (19), 103.0545 (9), 117.0646 (3), 102.0467 (2), 157.0652 (1), 174.0918 (1), 142.0733 (0.1), 188.1431 (0), 202.1565 (0), 74.0148 (0), 57.0688 (0)      |

|                                                                                                                     |          |      |                                                                                                                                                                                               |
|---------------------------------------------------------------------------------------------------------------------|----------|------|-----------------------------------------------------------------------------------------------------------------------------------------------------------------------------------------------|
| Undeca-2E/Z-ene-8,10-diynoic acid isobutylamide <sup>a</sup>                                                        | 232.1701 | 20.5 | 91.0546 (100), 128.0625 (59), 115.0546 (51), 116.0620 (39), 105.0702 (36), 129.0693 (21), 103.0546 (20)                                                                                       |
| Dodeca-2E,4Z-diene-8,10-diynoic acid isobutylamide                                                                  | 244.1703 | 20.7 | 91.0546 (34), 129.0688 (24), 116.0618 (19), 156.0634 (2), 157.0652 (1), 188.1076 (0.4), 174.0912 (0.4), 88.1112 (0.1), 216.1756 (0), 57.0687 (0)                                              |
| Dodeca-2E-ene-8,10-diynoic acid isobutylamide <sup>a</sup>                                                          | 246.1857 | 20.9 | 152.1073 (100), 96.0448 (74), 91.0545 (66), 95.0494 (62), 105.0702 (53), 117.0701 (40), 115.0546 (34), 130.0776 (22), 129.0697 (22), 103.0545 (15), 77.0379 (10)                              |
| Trideca-2E,7Z-diene-10,12-diynoic acid isobutylamide                                                                | 258.1860 | 21.0 | 117.0701 (62), 128.0624 (60), 103.0546 (22), 142.0776 (18), 131.0853 (8), 157.1013 (2), 102.0467 (2), 156.0627 (1), 202.1229 (1), 185.0964 (1), 230.1907 (0.1), 216.1751 (0.1), 74.0138 (0)   |
| Dodeca-2,4-diene-8,10-diynoic acid 2-methylbutylamide                                                               | 258.1860 | 21.0 | 91.0546 (74), 117.0701 (62), 105.0702 (30), 116.0607 (19), 142.0776 (18), 143.0847 (7), 168.0815 (1), 156.0627 (1), 202.1229 (1), 171.0797 (0.4), 188.1436 (0.3), 230.1907 (0.1), 88.1124 (0) |
| Dodeca-2E,4Z,10E-triene-8-ynoic acid 2-methylbutylamide<br>OR<br>Dodeca-2E-ene-8,10-diynoic acid 2-methylbutylamide | 260.2010 | 21.1 | 116.0608 (20), 142.0775 (17), 145.1014 (7), 119.0855 (5), 173.0836 (0.4), 190.1239 (0.1), 88.0301 (0)                                                                                         |
| <b>Dichloromethanolic Extracts obtained from Flowers – Fraction 2 ii (DE-F-F2 ii)</b>                               |          |      |                                                                                                                                                                                               |
| Dodeca-2,4,10-triene-8-ynoic acid isobutylamide (isomer 1)                                                          | 246.1855 | 18.3 | 119.0861 (54), 145.1017 (50), 93.0699 (21), 128.0622 (19), 102.0917 (8)                                                                                                                       |
| Trideca-2E,7Z-diene-10,12-diynoic acid 2-methylbutylamide                                                           | 272.2011 | 21.2 | 116.0609 (21), 157.1010 (3), 202.1229 (1), 185.0957 (1), 88.1116 (0.1)                                                                                                                        |
| Dodeca-2E,4E,8Z,10E/Z-tetraenoic acid isobutylamide <sup>a</sup>                                                    | 248.2028 | 21.2 | 152.1073 (100), 95.0493 (58), 96.0447 (56), 110.0603 (17), 124.0759 (13), 167.1305 (12), 153.1106 (10), 112.0758 (10), 91.0544 (10), 81.0692 (9)                                              |
| Pentadeca-2E,9Z-diene-12,14-diynoic acid isobutylamide                                                              | 286.2166 | 21.5 | 102.0914 (5), 57.0687 (0.3), 185.1322 (0.2), 230.153 (0.1)                                                                                                                                    |
| <b>Dichloromethanolic Extracts obtained from Flowers – Fraction 2 iii (DE-F-F2 iii)</b>                             |          |      |                                                                                                                                                                                               |
| Dodeca-2E,4E,8Z-trienoic acid isobutylamide (isomer 1)                                                              | 250.2167 | 21.4 | 154.1228 (14), 149.1327 (8), 83.0849 (6), 97.1014 (5), 177.1274 (4), 168.1375 (4), 194.1537 (2), 102.0909 (1)                                                                                 |
| Dodeca-2E,4E,8Z-trienoic acid isobutylamide                                                                         | 250.2170 | 21.6 | 97.0494 (3), 102.0915 (3), 168.1347 (2), 83.0359 (2), 154.1214 (2), 194.1541 (1), 177.1277 (1), 149.1328 (0.4), 57.0684 (0.1)                                                                 |
| Dodeca-2E,4E,8Z,10E/Z-tetraenoic acid 2-methylbutylamide                                                            | 262.2168 | 21.5 | 116.1072 (3), 147.1171 (2), 88.1113 (1), 175.1120 (0.5), 192.1385 (0.2), 71.0848 (0.1)                                                                                                        |

|                                                                         |          |      |                                                                                                                                                                                               |
|-------------------------------------------------------------------------|----------|------|-----------------------------------------------------------------------------------------------------------------------------------------------------------------------------------------------|
| Dodeca-2E,4E-dienoic acid isobutylamide <sup>a</sup>                    | 252.2325 | 22.0 | 95.0857 (100), 98.0603 (90), 95.0494 (50), 81.0692 (45), 196.1697 (31), 109.1013 (27), 112.0758 (26), 126.0915 (23)                                                                           |
| <b>Ethanollic Extracts obtained from Flowers – Fraction 2 (EE-F-F2)</b> |          |      |                                                                                                                                                                                               |
| Dodeca-2E,4Z,10E-triene-8-ynoic acid isobutylamide                      | 246.1852 | 14.9 | 145.1015 (51), 119.0859 (44), 93.0683 (13), 128.0617 (8), 173.0981 (6)                                                                                                                        |
| Dodeca-2E,4Z,10Z-triene-8-ynoic acid isobutylamide                      | 246.1854 | 15.4 | 145.101 (49), 119.0860 (39), 128.0618 (8), 173.0962 (7), 93.0690 (7), 190.1218 (3), 154.1242 (2)                                                                                              |
| Dodeca-2E,4E,10Z-triene-8-ynoic acid isobutylamide                      | 246.1854 | 18.9 | 145.1014 (51), 119.0857 (49), 93.0701 (18), 128.0623 (16), 173.0952 (6), 190.1215 (2), 154.1219 (2), 102.0916 (1)                                                                             |
| Dodeca-2E,4E,10E-triene-8-ynoic acid isobutylamide                      | 246.1854 | 20.2 | 119.0858 (29), 93.0700 (15), 145.1019 (6), 128.0621 (6), 173.0965 (1)                                                                                                                         |
| Undeca-2E,4Z-diene-8,10-diynoic acid isobutylamide                      | 230.1545 | 20.2 | 128.0622 (100), 91.0543 (42), 116.0617 (27), 129.0682 (19), 103.0542 (9), 117.0648 (3), 102.0464 (2), 157.0649 (1), 174.0914 (1), 142.0636 (0.1), 202.1588 (0), 188.1420 (0), 57.0686 (0)     |
| Undeca-2E/Z-ene-8,10-diynoic acid isobutylamide <sup>a</sup>            | 232.1697 | 20.5 | 91.0542 (100), 128.0622 (81), 115.0543 (57), 116.0617 (41), 105.0699 (34), 129.0689 (26), 103.0543 (20)                                                                                       |
| Pentadeca-2E,9Z-diene-12,14-diynoic acid 2-hydroxyisobutylamide         | 302.2116 | 20.6 | 118.0743 (2), 185.1326 (2), 213.1283 (0.4), 90.0422 (0.2)                                                                                                                                     |
| Dodeca-2E,4Z-diene-8,10-diynoic acid isobutylamide                      | 244.1699 | 20.7 | 91.0543 (36), 129.0688 (24), 116.0616 (20), 156.0632 (2), 157.0656 (1), 174.0914 (0.3), 188.1074 (0.3), 88.1110 (0.1), 216.1386 (0), 57.0693 (0)                                              |
| Dodeca-2E-ene-8,10-diynoic acid isobutylamide <sup>a</sup>              | 246.1855 | 20.9 | 152.1071 (100), 96.0446 (77), 91.0543 (70), 105.07 (58), 117.0698 (44), 115.0544 (41), 129.0696 (25), 130.0776 (25), 103.0544 (18), 77.0378 (10)                                              |
| Trideca-2E,7Z-diene-10,12-diynoic acid isobutylamide                    | 258.1856 | 20.9 | 117.0700 (55), 128.0623 (50), 103.0544 (21), 142.0776 (19), 131.0855 (6), 157.1012 (2), 102.0466 (2), 156.0826 (1), 202.1231 (1), 185.0964 (1), 230.1909 (0.1), 216.1747 (0.1), 74.0144 (0)   |
| Dodeca-2,4-diene-8,10-diynoic acid 2-methylbutylamide                   | 258.1856 | 20.9 | 91.0544 (68), 117.0700 (55), 105.0700 (20), 142.0776 (19), 116.0605 (18), 143.0842 (5), 168.0814 (1), 156.0826 (1), 202.1231 (1), 188.1435 (0.3), 171.0775 (0.2), 230.1909 (0.1), 88.0634 (0) |
| Trideca-2E,7Z-diene-10,12-diynoic acid 2-methylbutylamide               | 272.2010 | 21.2 | 116.0606 (19), 157.1012 (4), 202.1232 (1), 185.0964 (1), 88.1113 (0.2)                                                                                                                        |
| Dodeca-2E,4E,8Z,10E/Z-tetraenoic acid isobutylamide <sup>a</sup>        | 248.2021 | 21.4 | 152.1073 (100), 95.0493 (60), 96.0447 (58), 110.0602 (17), 124.076 (14), 167.1305 (13), 153.1106 (11), 112.0757 (10), 91.0543 (10), 81.0692 (10)                                              |
| Dodeca-2E,4Z,10E-triene-8-ynoic acid 2-methylbutylamide                 | 260.2009 | 21.2 | 119.0857 (27), 145.1014 (23), 116.0616 (22), 142.0770 (8), 173.0961 (3), 190.1227 (2)                                                                                                         |

---

|                                                          |          |      |                                                                                                                              |
|----------------------------------------------------------|----------|------|------------------------------------------------------------------------------------------------------------------------------|
| OR                                                       |          |      |                                                                                                                              |
| Dodeca-2E-ene-8,10-diynoic acid 2-methylbutylamide       |          |      |                                                                                                                              |
| Pentadeca-2E,9Z-diene-12,14-diynoic acid isobutylamide   | 286.2166 | 21.5 | 102.0918 (4), 185.1302 (1)                                                                                                   |
| Dodeca-2E,4E,8Z-trienoic acid isobutylamide              | 250.2168 | 21.6 | 97.0490 (4), 102.0916 (3), 168.1348 (2), 83.0359 (2), 154.1219 (1), 194.1542 (1), 149.1332 (1), 177.1272 (0.4), 57.068 (0.1) |
| Dodeca-2E,4E,8Z,10E/Z-tetraenoic acid 2-methylbutylamide | 262.2168 | 21.5 | 116.1071 (3), 147.1174 (2), 175.1124 (1), 88.1116 (1), 192.1385 (0.3)                                                        |
| Dodeca-2E,4E-dienoic acid isobutylamide <sup>a</sup>     | 252.2325 | 22.0 | 95.0857 (100), 98.0602 (92), 95.0493 (53), 81.0693 (43), 196.1699 (32), 112.0759 (28), 109.1013 (28), 126.0916 (25)          |

F: flowers; R: roots; EE: ethanolic extracts; DE: dichloromethanolic extracts; F2: alkylamide fraction.

<sup>a</sup>Injected standards

<sup>1</sup>The MS<sup>2</sup> data were obtained from the fragmentation of the [M + H]<sup>+</sup> precursor ion of alkylamides. Relative intensities of product ions are in parentheses.

E/Z stereochemistry is indicated here in accordance with literature [1–7], but it should be highlighted that without conformational NMR spectra, it is not possible to conclusively distinguish between E and Z isomers.



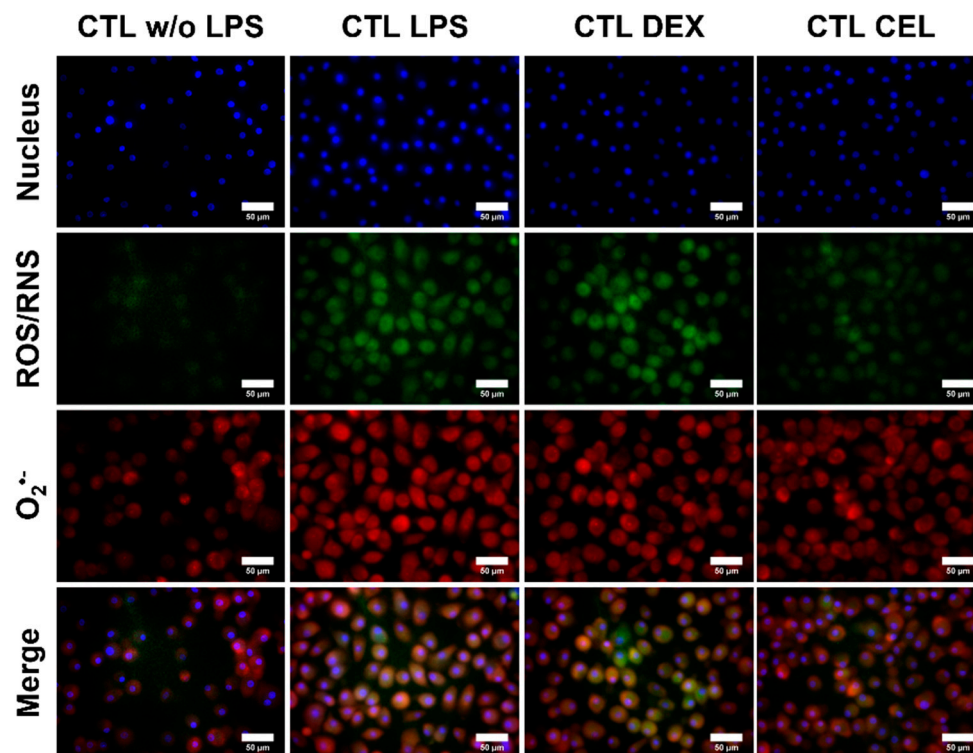

**Figure S1.** Intracellular ROS/RNS (green) and  $O_2^{\bullet-}$  (red) production in LPS-stimulated human monocyte-derived macrophages (hMDM, nucleus in blue) in the absence or in the presence of clinically used anti-inflammatory drugs (dexamethasone -DEX- and celecoxib -CEL, 10  $\mu$ M) for 24 h. CTL: control. Scale bar = 50  $\mu$ m.

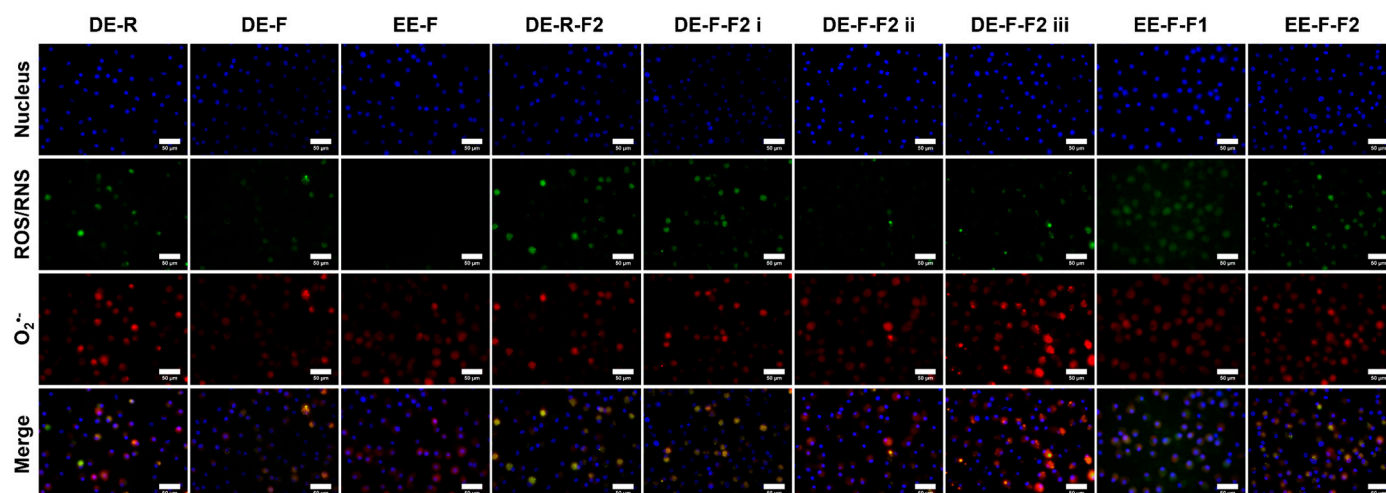

**Figure S2.** Intracellular ROS/RNS (green) and  $O_2^{\bullet-}$  (red) production in LPS-stimulated human monocyte-derived macrophages (hMDM, nucleus in blue) in the presence of *E. purpurea* extracts or fractions for 22 h. DE: dichloromethanolic extracts; EE: ethanolic extracts; R: roots; F: flowers; F1: phenol/carboxylic acid fraction; F2: alkylamide fraction. Scale bar = 50  $\mu$ m.

## References

1. Cech, N.B.; Eleazer, M.S.; Shoffner, L.T.; Crosswhite, M.R.; Davis, A.C.; Mortenson, A.M. High performance liquid chromatography/electrospray ionization mass spectrometry for simultaneous analysis of alkamides and caffeic acid

- derivatives from *Echinacea purpurea* extracts. *J. Chromatogr. A* **2006**, *1103*, 219–228, doi:<https://doi.org/10.1016/j.chroma.2005.11.008>.
2. Spelman, K.; Wetschler, M.H.; Cech, N.B. Comparison of alkylamide yield in ethanolic extracts prepared from fresh versus dry *Echinacea purpurea* utilizing HPLC–ESI-MS. *J. Pharm. Biomed. Anal.* **2009**, *49*, 1141–1149, doi:<https://doi.org/10.1016/j.jpba.2009.02.011>.
  3. Pellati, F.; Epifano, F.; Contaldo, N.; Orlandini, G.; Cavicchi, L.; Genovese, S.; Bertelli, D.; Benvenuti, S.; Curini, M.; Bertaccini, A.; et al. Chromatographic methods for metabolite profiling of virus- and phytoplasma-infected plants of *Echinacea purpurea*. *J. Agric. Food Chem.* **2011**, *59*, 10425–10434, doi:10.1021/jf2025677.
  4. Thomsen, M.O.; Fretté, X.C.; Christensen, K.B.; Christensen, L.P.; Grevsen, K. Seasonal variations in the concentrations of lipophilic compounds and phenolic acids in the roots of *Echinacea purpurea* and *Echinacea pallida*. *J. Agric. Food Chem.* **2012**, *60*, 12131–12141, doi:10.1021/jf303292t.
  5. He, X.; Lin, L.; Bernart, M.W.; Lian, L. Analysis of alkamides in roots and achenes of *Echinacea purpurea* by liquid chromatography–electrospray mass spectrometry. *J. Chromatogr. A* **1998**, *815*, 205–211, doi:[https://doi.org/10.1016/S0021-9673\(98\)00447-6](https://doi.org/10.1016/S0021-9673(98)00447-6).
  6. Mudge, E.; Lopes-Lutz, D.; Brown, P.; Schieber, A. Analysis of alkylamides in *Echinacea* plant materials and dietary supplements by ultrafast liquid chromatography with diode array and mass spectrometric detection. *J. Agric. Food Chem.* **2011**, *59*, 8086–8094, doi:10.1021/jf201158k.
  7. Bauer, R.; Remiger, P. TLC and HPLC analysis of alkamides in *Echinacea* drugs. *Planta Med.* **1989**, *55*, 367–371, doi:10.1055/s-2006-962030.
